# Supplementary material
Source: PubMed Central journal article supplement (PMC3128308)
Supplement: Supp_Data.pdf [file Supp_Data.pdf]

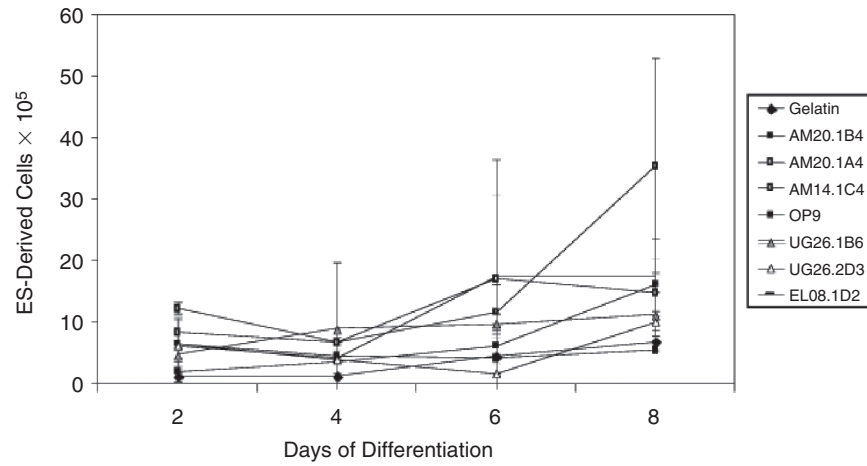

**SUPPLEMENTARY FIG. 1.** Growth rates of Bry-201 embryoid body (EB) cells in co-culture. There were no significant differences between the growth rates of Bry-201 embryonic stem (ES) cells differentiating on gelatin or in enhancing or non-enhancing stromal co-cultures ( $P > 0.05$ ).

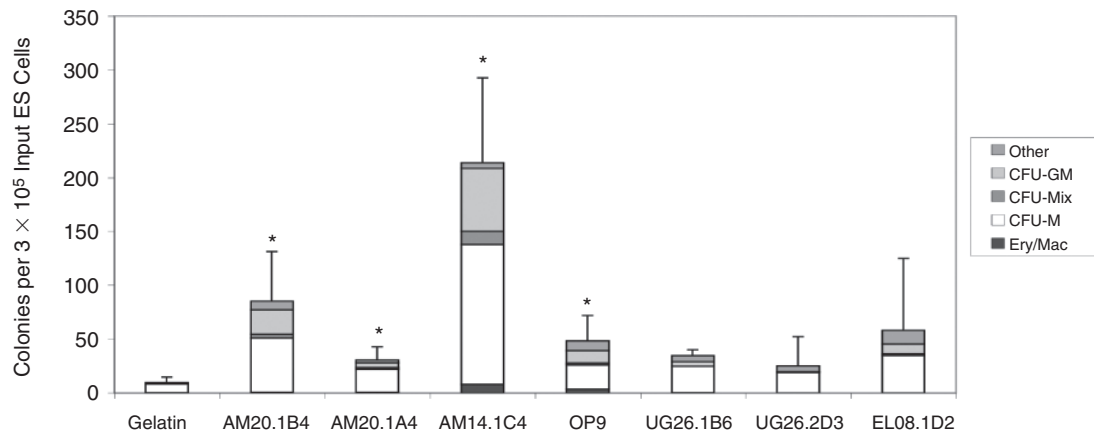

**SUPPLEMENTARY FIG. 2.** Hematopoietic activity in Bry-201 embryoid bodies (EBs) differentiated on stromal cell lines. The number of hematopoietic progenitor cells (CFU) per  $3 \times 10^5$  input embryonic stem (ES)-derived cells. Data for 3 independent experiments ( $\pm$ SD) with Bry-201 ES cells were in accordance with the hematopoietic inducing activity of stroma on 7a-GFP ES cells. \* $p < 0.05$ .

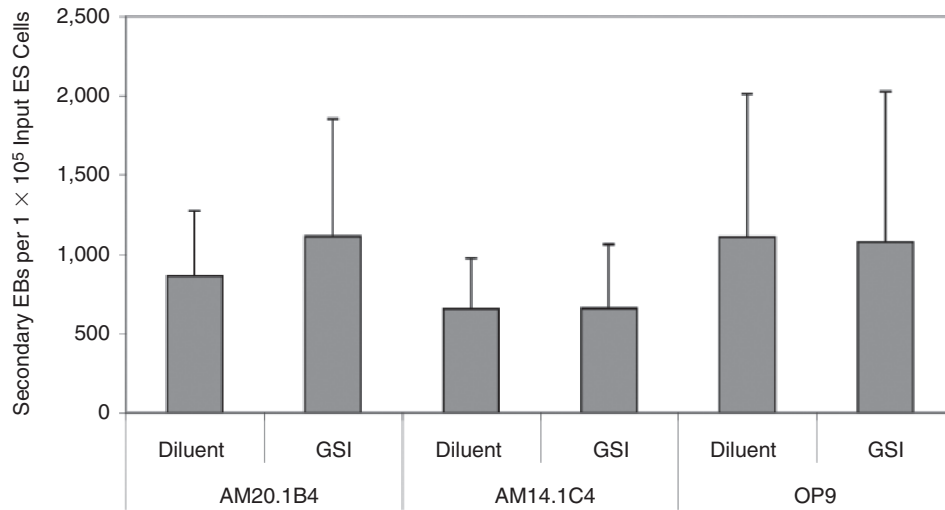

**SUPPLEMENTARY FIG. 3.**  $\gamma$ -Secretase inhibition of embryoid body (EB)/stromal co-cultures. The frequency of secondary (nonhematopoietic) EBs per  $1 \times 10^5$  input embryonic stem (ES)-derived cells in colony assays setup with 6 day co-cultures. The addition of gamma-secretase inhibitor (GSI) to co-cultures between 4 and 6 days differentiation did not affect the formation of secondary EBs in CFU assays, demonstrating that GSI did not have a general toxic effect on cell survival or proliferation.
